# Supplementary material for: Competent immune responses to SARS-CoV-2 variants in older adults following two doses of mRNA vaccination
Source: Springer Nature journal article supplement (doi:10.1038/s41467-022-30617-9), 2022-05-24
Supplement: 41467_2022_30617_MOESM1_ESM.pdf [file 41467_2022_30617_MOESM1_ESM.pdf]

## Supplemental Information

### Competent immune responses to SARS-CoV-2 variants in older adults following two doses of mRNA vaccination

Mladen Jergović<sup>\*1,2</sup>, Jennifer L. Uhrlaub<sup>\*1,2</sup>, Makiko Watanabe<sup>1,2</sup>, Christine M. Bradshaw<sup>1,2</sup>, Lisa M. White<sup>3</sup>, Bonnie J. LaFleur<sup>3</sup>, Taylor Edwards<sup>4</sup>, Ryan Sprissler<sup>4,5</sup>, Michael Worobey<sup>6</sup>, Deepta Bhattacharya<sup>1,3</sup>, Janko Nikolich-Žugich<sup>1,2,3,#</sup>

1- Department of Immunobiology, University of Arizona College of Medicine, Tucson, AZ, USA

2- University of Arizona Center on Aging, University of Arizona, College of Medicine, Tucson, Tucson, AZ, USA;

3- BIO5 Institute, University of Arizona, Tucson, USA

4- University of Arizona Genetics Core, University of Arizona, Tucson, AZ, USA

5- Center for Applied Genetics and Genomic Medicine, University of Arizona, Tucson, AZ, USA

6-Department of Ecology and Evolutionary Biology, University of Arizona, Tucson, AZ 85721, USA.

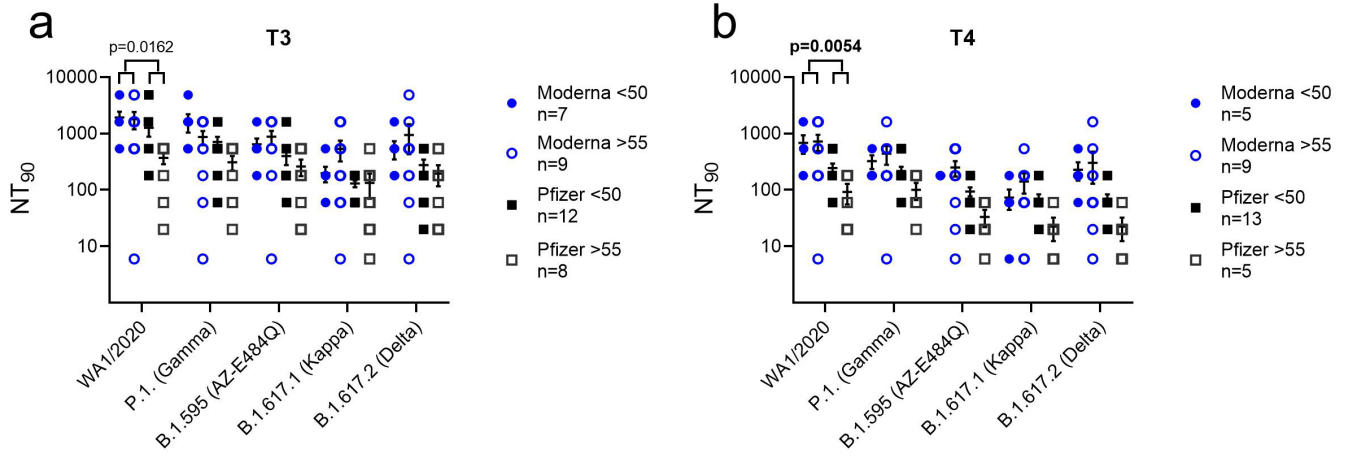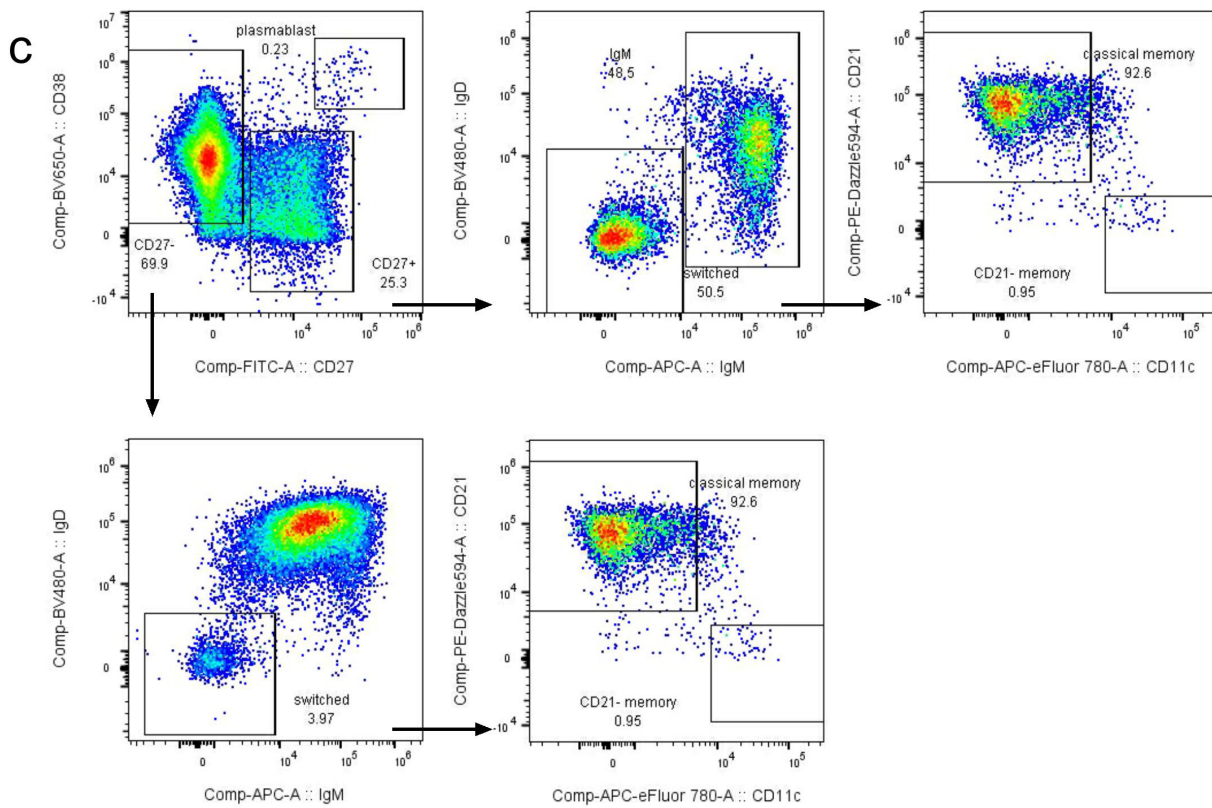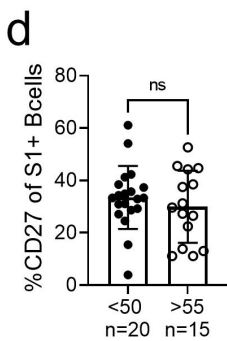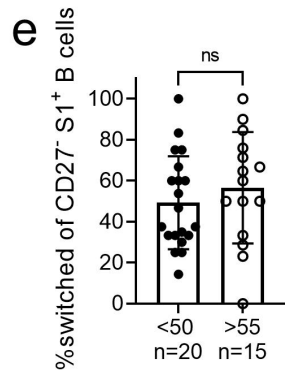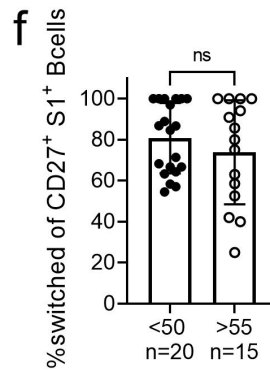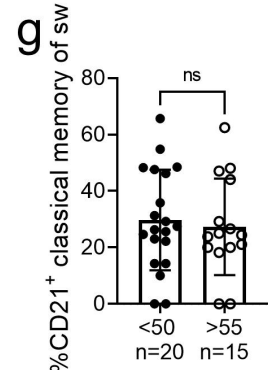

**Supplementary Fig 1. SARS-CoV-2 specific memory B cells differentiate equally in <50 and >55 cohorts.**

Lower neutralization titers in recipients of Pfizer's mRNA vaccine at T3 (a) and T4 (b). c) B cells gated as in Figure 3A and then as illustrated to examine B cell differentiation of tetramer positive gates. d) Percentage of CD27 expressing B cells among tetramer positive cells was equal between cohorts. e & f) Equal percentage of SARS-CoV-2 specific B cells were class switched among CD27 positive and negative cells between <50 and >55 cohorts. g) Expression of CD21 (Classical memory) was also equal between <50 and >55 cohorts. All data presented as mean values +/- SEM. Two-tailed Mann-Whitney U test.

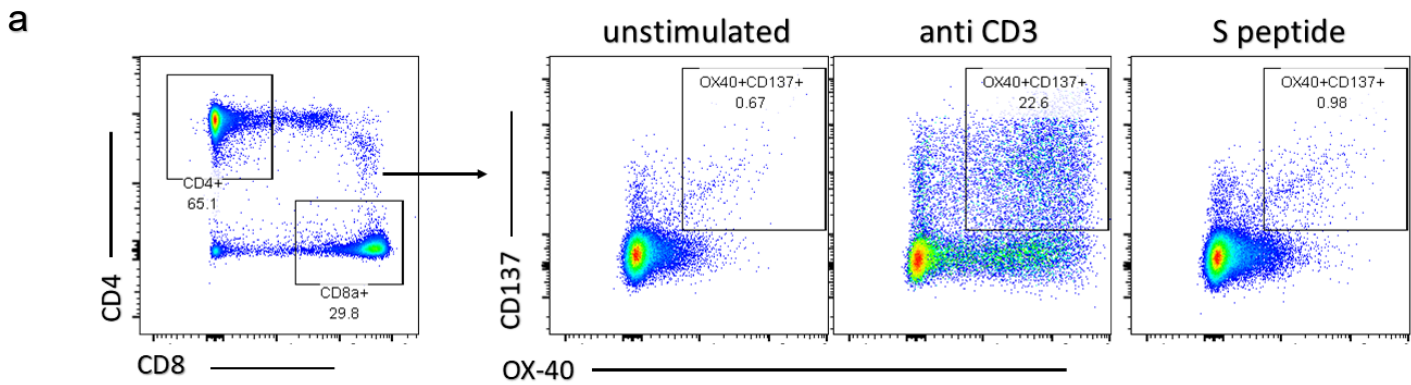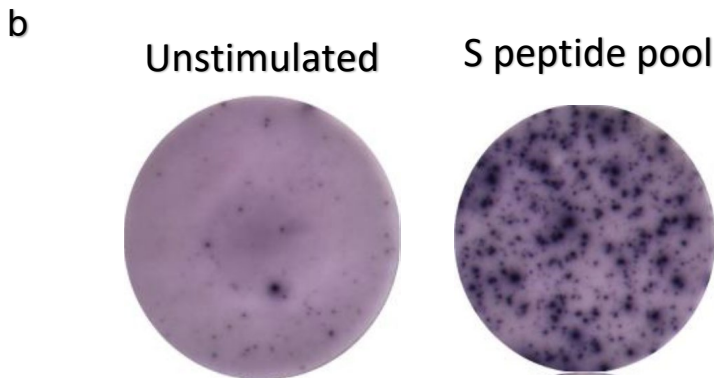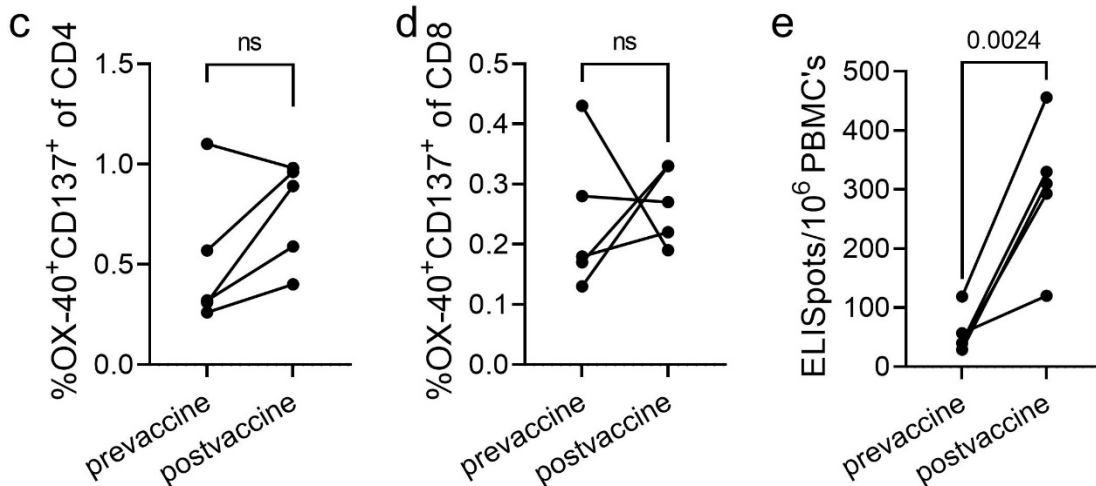

**Supplementary Fig 2. ELISpot is more specific method for enumeration of SARS-CoV-2 specific T cells.**

**a)** Representative flow cytometric gating for identifying CD137<sup>+</sup>OX-40<sup>+</sup> double positive CD4 and CD8 T cells. Singlet live cells were previously gated as in Figure 3A. **b)** Representative unstimulated and Spike protein peptide pool stimulated ELISpot wells. PBMCs from 5 participants were stimulated overnight with USA-WA1/2020 spike peptide pool. SARS-CoV-2 specific T cells were enumerated by either flow cytometry (**c,d**) or ELISpot (**e**). ELISpot proved to be a more sensitive method with statistically significant difference before and after vaccination with N=5. All data presented as mean values +/- SEM. Two-tailed Mann-Whitney U test, for all statistical differences \*\*p<0.01.

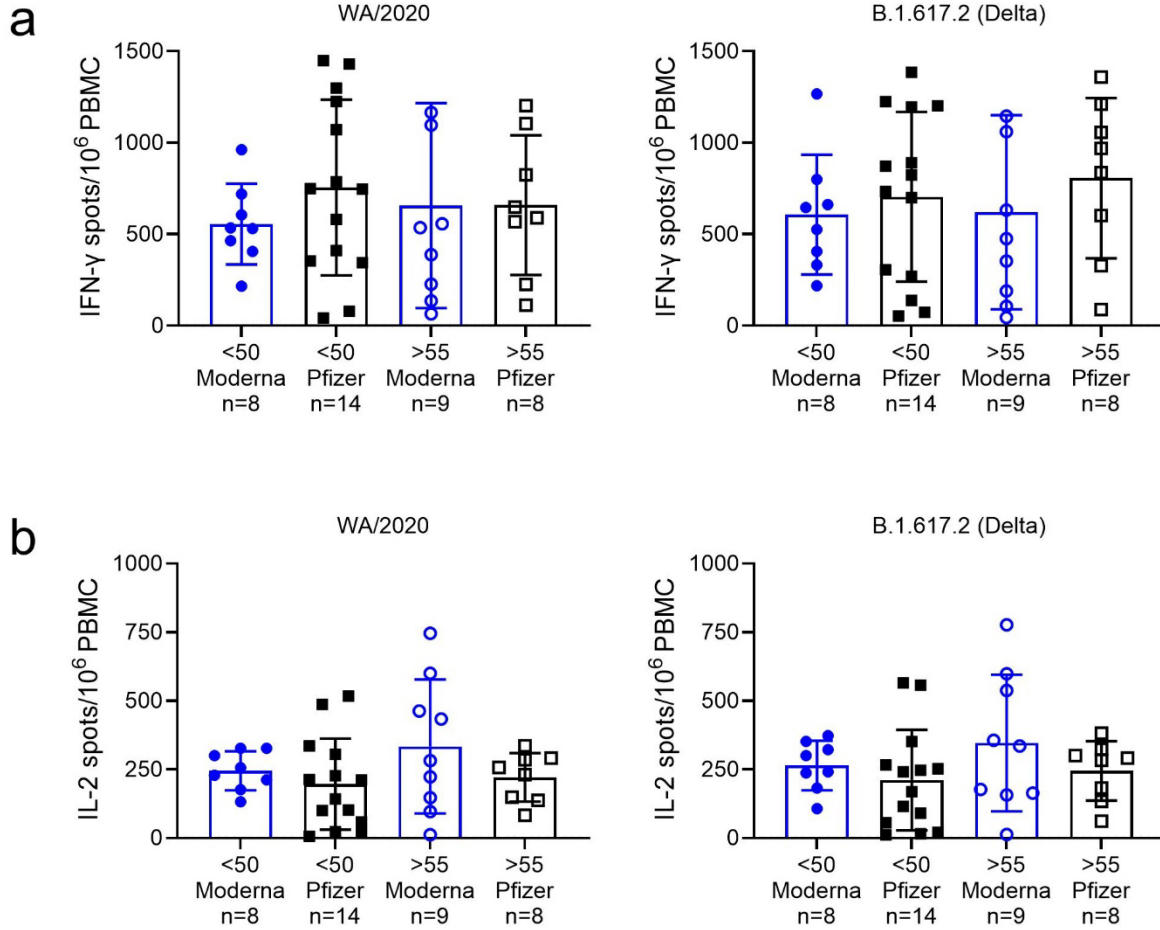

**Supplementary Fig 3. Vaccine brand did not differentially impact T cell responses in these cohorts.** Number of IFN- $\gamma$  ELISpots (a) or IL-2 ELISpots (b) was not statistically different between recipients of Moderna and Pfizer mRNA vaccines at the T4 time point. Kruskal-Wallis test with Dunn's post-hoc correction. All data presented as mean values +/- SEM.

**Supplemental Table 1.** List of antibodies used for flow cytometry analysis.

| <b>Antigen</b> | <b>Fluorochrome</b> | <b>Ab. clone</b> | <b>Manufacturer</b> | <b>Cat.No.</b> | <b>Dilution</b> |
|----------------|---------------------|------------------|---------------------|----------------|-----------------|
| CD19           | Spark NIR™ 685      | HIB19            | Biolegend           | 302270         | 1/50            |
| CD27           | FITC                | 0323             | Biolegend           | 302806         | 1/50            |
| CD38           | BV650               | HB-7             | Biolegend           | 356620         | 1/50            |
| IgD            | BV480               | 11-26C.1         | Becton Dickinson    | 566138         | 1/50            |
| IgM            | APC                 | MHM-88           | Biolegend           | 314510         | 1/50            |
| CD11c          | APCe780             | 3.9              | ThermoFisher        | 47-0116-42     | 1/25            |
| CD3            | BV510               | OKT3             | Biolegend           | 317332         | 1/50            |
| CD21           | Pedazzle594         | Bu32             | Biolegend           | 354922         | 1/50            |
| CD4            | SparkBlue550        | SK3              | Biolegend           | 344656         | 1/100           |
| CD13           | PECy7               | WM15             | Biolegend           | 301712         | 1/50            |
| CD8            | BUV395              | RPA-T8           | Becton Dickinson    | 563795         | 1/50            |
| CD137          | PE-Cy5              | 4B4-1            | Biolegend           | 309808         | 1/50            |
