# Supplementary material for: Competent immune responses to SARS-CoV-2 variants in older adults following two doses of mRNA vaccination
Source: Springer Nature journal article supplement (doi:10.1038/s41467-022-30617-9), 2022-05-24
Supplement: 41467_2022_30617_MOESM3_ESM.pdf [file 41467_2022_30617_MOESM3_ESM.pdf]

## Reporting Summary

Nature Portfolio wishes to improve the reproducibility of the work that we publish. This form provides structure for consistency and transparency in reporting. For further information on Nature Portfolio policies, see our [Editorial Policies](#) and the [Editorial Policy Checklist](#).

### Statistics

For all statistical analyses, confirm that the following items are present in the figure legend, table legend, main text, or Methods section.

n/a Confirmed

- The exact sample size ( $n$ ) for each experimental group/condition, given as a discrete number and unit of measurement
- A statement on whether measurements were taken from distinct samples or whether the same sample was measured repeatedly
- The statistical test(s) used AND whether they are one- or two-sided  
*Only common tests should be described solely by name; describe more complex techniques in the Methods section.*
- A description of all covariates tested
- A description of any assumptions or corrections, such as tests of normality and adjustment for multiple comparisons
- A full description of the statistical parameters including central tendency (e.g. means) or other basic estimates (e.g. regression coefficient) AND variation (e.g. standard deviation) or associated estimates of uncertainty (e.g. confidence intervals)
- For null hypothesis testing, the test statistic (e.g.  $F$ ,  $t$ ,  $r$ ) with confidence intervals, effect sizes, degrees of freedom and  $P$  value noted  
*Give  $P$  values as exact values whenever suitable.*
- For Bayesian analysis, information on the choice of priors and Markov chain Monte Carlo settings
- For hierarchical and complex designs, identification of the appropriate level for tests and full reporting of outcomes
- Estimates of effect sizes (e.g. Cohen's  $d$ , Pearson's  $r$ ), indicating how they were calculated

*Our web collection on [statistics for biologists](#) contains articles on many of the points above.*

### Software and code

Policy information about [availability of computer code](#)

Data collection  
CTL mmunoSpot® 7.0 Pro DC  
Mabtech Apex 1.1  
SpectroFlo

Data analysis  
Flowjo v10  
Graphpad prism 7  
CTL mmunoSpot® 7.0 Pro DC  
Mabtech Apex 1.1

For manuscripts utilizing custom algorithms or software that are central to the research but not yet described in published literature, software must be made available to editors and reviewers. We strongly encourage code deposition in a community repository (e.g. GitHub). See the Nature Portfolio [guidelines for submitting code & software](#) for further information.

### Data

Policy information about [availability of data](#)

All manuscripts must include a [data availability statement](#). This statement should provide the following information, where applicable:

- Accession codes, unique identifiers, or web links for publicly available datasets
- A description of any restrictions on data availability
- For clinical datasets or third party data, please ensure that the statement adheres to our [policy](#)

Source data are provided with this paper. The flow cytometric data used for analysis of SARS-CoV-2 specific B cells in Fig. 3 has been deposited to flow repository.org and is accessible through accession number FR-FCM-Z56D.

# Field-specific reporting

Please select the one below that is the best fit for your research. If you are not sure, read the appropriate sections before making your selection.

Life sciences       Behavioural & social sciences       Ecological, evolutionary & environmental sciences

For a reference copy of the document with all sections, see [nature.com/documents/nr-reporting-summary-flat.pdf](https://www.nature.com/documents/nr-reporting-summary-flat.pdf)

## Life sciences study design

All studies must disclose on these points even when the disclosure is negative.

|                 |                                                                                                                                                                                                                                                                               |
|-----------------|-------------------------------------------------------------------------------------------------------------------------------------------------------------------------------------------------------------------------------------------------------------------------------|
| Sample size     | Our final cohort included 23 participants under 50 years of age (<50) and 17 participants over the age of 55 (>55). All participants recruited before December 2021 and for which prevaccination bleed and post vaccination bleeds were obtained were recruited in the study. |
| Data exclusions | One participant was excluded from the study because they had a high neutralizing antibody titer and a strong antigen specific T cell response before vaccination, indicating prior infection.                                                                                 |
| Replication     | No replication was done as human sample is limited.                                                                                                                                                                                                                           |
| Randomization   | Participants were allocated to study groups exclusively by chronological age.                                                                                                                                                                                                 |
| Blinding        | All the subject samples were deidentified and assigned name codes. Researchers were not aware of participant age and group during data collection and analysis.                                                                                                               |

## Reporting for specific materials, systems and methods

We require information from authors about some types of materials, experimental systems and methods used in many studies. Here, indicate whether each material, system or method listed is relevant to your study. If you are not sure if a list item applies to your research, read the appropriate section before selecting a response.

### Materials & experimental systems

### Methods

| n/a                                 | Involved in the study                                           | n/a                                 | Involved in the study                              |
|-------------------------------------|-----------------------------------------------------------------|-------------------------------------|----------------------------------------------------|
| <input type="checkbox"/>            | <input checked="" type="checkbox"/> Antibodies                  | <input checked="" type="checkbox"/> | <input type="checkbox"/> ChIP-seq                  |
| <input type="checkbox"/>            | <input checked="" type="checkbox"/> Eukaryotic cell lines       | <input type="checkbox"/>            | <input checked="" type="checkbox"/> Flow cytometry |
| <input checked="" type="checkbox"/> | <input type="checkbox"/> Palaeontology and archaeology          | <input checked="" type="checkbox"/> | <input type="checkbox"/> MRI-based neuroimaging    |
| <input checked="" type="checkbox"/> | <input type="checkbox"/> Animals and other organisms            |                                     |                                                    |
| <input type="checkbox"/>            | <input checked="" type="checkbox"/> Human research participants |                                     |                                                    |
| <input checked="" type="checkbox"/> | <input type="checkbox"/> Clinical data                          |                                     |                                                    |
| <input checked="" type="checkbox"/> | <input type="checkbox"/> Dual use research of concern           |                                     |                                                    |

## Antibodies

|                 |                                                                                                                                                                                                                                                                                                                                                                                                                                                                                                                                                                                                                                    |
|-----------------|------------------------------------------------------------------------------------------------------------------------------------------------------------------------------------------------------------------------------------------------------------------------------------------------------------------------------------------------------------------------------------------------------------------------------------------------------------------------------------------------------------------------------------------------------------------------------------------------------------------------------------|
| Antibodies used | <p>Marker Fluorochrome Manufacturer Cat.No. Clone</p> <p>CD19 Spark NIR™ 685 Biolegend 302270</p> <p>HIB19</p> <p>CD27 FITC Biolegend 302806 0323</p> <p>CD38 BV650 Biolegend 356620</p> <p>HB-7</p> <p>CD11c APCe780 Thermofisher 47-0116-42 3.9</p> <p>IgD BV480 BD 566138 11-26C.1</p> <p>IgM APC Biolegend 314510</p> <p>MHM-88</p> <p>CD3 BV510 Biolegend 317332</p> <p>OKT3</p> <p>CD21 Pedazzle594 Biolegend 354922</p> <p>Bu32</p> <p>CD4 SparkBlue550 Biolegend 344656</p> <p>SK3</p> <p>CD13 PECy7 Biolegend 301712</p> <p>WM15</p> <p>CD8 BUV395 BD 563795 RPA-T8</p> <p>CD137 PE-Cy5 Biolegend 309808</p> <p>4B4-1</p> |
|-----------------|------------------------------------------------------------------------------------------------------------------------------------------------------------------------------------------------------------------------------------------------------------------------------------------------------------------------------------------------------------------------------------------------------------------------------------------------------------------------------------------------------------------------------------------------------------------------------------------------------------------------------------|

OX-40 PerCPCy5.5 Biolegend 350010 Ber-ACT35

## Validation

Antibodies were validated by the manufacturer. For all Biolegend antibodies: Each lot of this antibody is quality control tested by immunofluorescent staining with flow cytometric analysis.  
For ThermoFisher 47-0116-42 3.9: This 3.9 antibody has been pre-titrated and tested by flow cytometric analysis of human peripheral blood cells.

## Eukaryotic cell lines

### Policy information about cell lines

Cell line source(s) Vero Cells (ATCC #CCL-81), Calu-3 Cells (ATCC #HTB-55)

Authentication None of the cell lines were authenticated

Mycoplasma contamination The cells were confirmed mycoplasma negative by PCR screening.

Commonly misidentified lines (See ICLAC register) No commonly misidentified lines were used in this study.

## Human research participants

### Policy information about studies involving human research participants

Population characteristics Over 21 years old, both genders, any person who was eligible for COVID vaccination

Recruitment Participants were recruited from the local community by posting a flier in University buildings and social media. Self selection bias likely did not influence results as the study was concerned only with vaccinated individuals.

Ethics oversight University of Arizona Institutional Review Board (IRB) Protocol number 2102460536

Note that full information on the approval of the study protocol must also be provided in the manuscript.

## Flow Cytometry

### Plots

Confirm that:

- The axis labels state the marker and fluorochrome used (e.g. CD4-FITC).
- The axis scales are clearly visible. Include numbers along axes only for bottom left plot of group (a 'group' is an analysis of identical markers).
- All plots are contour plots with outliers or pseudocolor plots.
- A numerical value for number of cells or percentage (with statistics) is provided.

### Methodology

Sample preparation Cryopreserved PBMC (2-5 x 10<sup>6</sup>/sample) were thawed in prewarmed RPMI-1640 with L-glutamine (Lonza) + 10% FCS. Thawed PBMCs were rested overnight at 37 °C in X-VIVO 15 Serum-free Hematopoietic Cell Medium (Lonza) supplemented with 5% human Ab serum. Cells were stained with surface antibodies in PBS (Lonza) + 2% FCS, and 307 then stained with the live dead fixable blue dye (ThermoFisher).

Instrument Cytex Aurora

Software FCS files were analyzed by FlowJo software (Tree Star).

Cell population abundance At least 10000 CD19+ lymphocytes were recorded for each participant.

Gating strategy Lymphocytes were identified by size and granularity in the FSC/SSC scatter. Doublets were excluded by FSC width and area. Dead cells were excluded using live/dead fixable dyes.

- Tick this box to confirm that a figure exemplifying the gating strategy is provided in the Supplementary Information.
